# Supplementary material for: A Bayesian Outlier Criterion to Detect SNPs under Selection in Large Data Sets
Source: PubMed Central journal article supplement (PMC2914027; doi:10.1371/journal.pone.0011913), 2010-08-02
Supplement: pone.0011913.s001.pdf [file pone.0011913.s001.pdf]

A Metropolis-Hastings (MH) algorithm within Gibbs was implemented to generate the MCMC chains used to estimate the posterior distribution of each parameter of interest. At each iteration  $t$  of the algorithm, the parameters  $\alpha$  (or  $\beta$ ),  $\pi$  and  $c$  (ignoring the subscripts  $i$  and  $j$  for the sake of simplicity) are sampled according to the following steps.

1) Letting  $\theta_k$  the  $k^{th}$  parameter of interest and  $\theta_k^t$  its current value at iteration  $t$ , generate a candidate  $\tilde{\theta}_k^{t+1}$  according to a uniform distribution

$$\tilde{\theta}_k^{t+1} \sim U\left(\min(0, \theta_k^t - \delta_k / 2), \max(1, \theta_k^t + \delta_k / 2)\right) \quad (I.1)$$

where  $\delta_k$  is the range of variation allowed for the random walk in the uniform distribution around  $\theta_k^t$ .

2) Compute

$$\rho_k^{t+1} = \frac{p\left(\tilde{\theta}_k^{t+1} \mid \theta_{[k]}^c, x\right) \times \left(\max(1, \tilde{\theta}_k^{t+1} + \delta_k / 2) - \min(0, \tilde{\theta}_k^{t+1} - \delta_k / 2)\right)}{p\left(\theta_k^t \mid \theta_{[k]}^c, x\right) \times \left(\max(1, \theta_k^t + \delta_k / 2) - \min(0, \theta_k^t - \delta_k / 2)\right)}, \quad (I.2)$$

where  $\rho_k^{t+1}$  is the ratio of the densities of the conditional distribution of the candidate  $\tilde{\theta}_k^{t+1}$  and of the current value  $\theta_k^t$  (given the data  $x$  and the other parameters  $\theta_{[k]} = \theta \setminus \theta_k$  being equal to their current values  $\theta_{[k]}^c$ ) times the ratio of the densities of the proposal for the current and the candidate values.

3) Generate  $u_k^{t+1} \sim U(0,1)$ , a random uniform number on  $(0,1)$

4) If  $u_k^{t+1} \leq \rho_k^{t+1}$ , then take  $\theta_k^{t+1} = \tilde{\theta}_k^{t+1}$ , otherwise  $\theta_k^{t+1} = \theta_k^t$ .

The range of variation  $\delta_k$  for the different proposal distributions were initially adjusted during several successive pilot runs (*e.g.* of 1000 iterations) until achieving an acceptance rate for each parameters ranging from 0.25 to 0.4.

Now, we have to specify the density  $p(\cdot | \theta_{[k]}^c, x)$  involved in the computation of  $\rho_k^{t+1}$  for each parameter in models 1 and 2.

In model 1, we have

$$\text{i) } p(\beta | \pi, c, x) \propto p(\beta | \pi, c) p(x | \beta, \pi, c) \quad (\text{I.3})$$

with  $\beta | \pi, c \sim N[\pi, c\pi(1-\pi)]$  and  $x | \beta, \pi, c \equiv x | \beta \sim B(n, \alpha)$ ;

$$\text{ii) } p(\pi | \beta, c, x) \equiv p(\pi | \beta, c) \propto p(\beta | \pi, c) p(\pi). \quad (\text{I.4})$$

$$\text{iii) } p(c | \beta, \pi, x) \equiv p(c | \beta, \pi) \propto p(\beta | \pi, c) p(c). \quad (\text{I.5})$$

Notice that in the last two cases ii) and iii) the conditional densities no longer depend of the data.

The same scheme applies to model 2 except that sampling in the conditional  $\alpha | \pi, x$  is carried out directly due to the conjugacy property of the beta-binomial model so that

$$\alpha | \pi, x \sim \text{Beta}[\tau\pi + x, \tau(1-\pi) + n - x]. \quad (\text{I.6})$$

Typical runs of these two MCMC algorithms consisted generally in few tens of pilot runs, followed by 10,000 burn-in iterations. The posterior distributions were then computed from 5,000-10,000 post burn-in iterations with a thinning of 50 iterations (leading to 250,000-500,000 post burn-in iterations). Convergence of the MCMC was checked using standard criteria.
