# Supplementary material for: A Bayesian Outlier Criterion to Detect SNPs under Selection in Large Data Sets
Source: PubMed Central journal article supplement (PMC2914027; doi:10.1371/journal.pone.0011913), 2010-08-02
Supplement: pone.0011913.s003.pdf [file pone.0011913.s003.pdf]

### 1) Simulation under a pure-drift demographic model with selection

Let  $y_{ij,t}$  be the (reference) allele count for SNP  $i$  ( $1 \leq i \leq L$ ) in population  $j$  ( $1 \leq j \leq P$ ) at time  $t$  ( $0 \leq t \leq T$ ). Similarly, let  $\pi_i$  be the (reference) allele frequency in the ancestral population and  $N_j$  the (constant) diploid size of population  $j$ . At generation  $t = 0$ , the  $\pi_i$ 's were sampled from beta distributions with parameters 0.7 and 0.7 and truncated at 0.05 and 0.95 (to avoid a surplus of very low and high frequencies).

The corresponding  $y_{ij(0)}$  were then sampled from a binomial distribution  $y_{ij,0} \sim B(2N_j, \pi_i)$ . Selection is further introduced in the model by attaching a selective coefficient  $s_i$  ( $s_i = 0$  for a neutral locus) and a selection type (either positive or balancing) to each SNP. The simulation model for a particular SNP  $i$  within a particular population  $j$  proceeds as follows:

1. Following Beaumont and Balding [10], assign randomly the attribute (blue, b; red, r; or neutral, n) for population  $j$  at SNP  $i$  with  $p_{b,j} = 0.4$ ,  $p_{r,j} = 0.4$  and  $p_{n,j} = 0.2$

2. To model genetic drift, sample  $y_{ij,t}^*$  from a binomial distribution

$$y_{ij,t}^* \sim B(2N_j, y_{ij,t-1} / 2N_j)$$

3 To model selection, update the observed allele frequency  $p_{ij,t}^* = y_{ij,t}^* / 2N_j$  as follows:

31 Determine the allele fitness  $w_{ij}^{(.)}$  of each possible genotype assuming Hardy-Weinberg equilibrium. If the SNP is subjected to positive selection  $w_{ij}^{11} = 1 + \delta_{ij}s_i$  (homozygous for the reference allele),  $w_{ij}^{12} = 1 + 1/2s_i$  (heterozygous) and  $w_{ij}^{22} = 1 + (1 - \delta_{ij})s_i$  (homozygous for the alternative allele) where  $\delta_{ij} = 1$  (respectively  $\delta_{ij} = 0$ ) if the attribute of population  $j$  for SNP  $i$  is “blue” (respectively “red”) and

$w_{ij}^{11} = w_{ij}^{12} = w_{ij}^{22} = 1$  if the attribute of population  $j$  for SNP  $i$  is “neutral”. If the SNP is subjected to balancing selection  $w_{ij}^{11} = w_{ij}^{22} = 1$ ; and  $w_{ij}^{12} = 1 + s_i$  if the attribute of population  $j$  for SNP  $i$  is “blue” or “red” and  $w_{ij}^{12} = 1$  if it is “neutral”.

32 Compute the mean fitness  $\bar{w}_{j,t}$  for population  $j$  assuming Hardy–Weinberg equilibrium and calculate the allele count  $y_{ij,t}^*$  for the next generation from

$$\bar{w}_{j,t} = p_{ij,t}^{*2} w_{ij}^{(11)} + 2p_{ij,t}^* (1 - p_{ij,t}^*) w_{ij}^{(12)} + (1 - p_{ij,t}^*)^2 w_{ij}^{(22)}$$

and

$$y_{ij,t}^* = 2N_j \left[ p_{ij,t}^{*2} w_{ij}^{(11)} + p_{ij,t}^* (1 - p_{ij,t}^*) w_{ij}^{(12)} \right] / \bar{w}_{j,t}$$

4 Go to step 2 until  $t=T$

## **2) Simulation under a migration-drift demographic model (at equilibrium) with selection**

Migration Drift model with selection was simulated according to a simplified version of previously proposed algorithms [10,13]. The simulation model was thus similar to the one describe above in AIII1 except that an additional population parameter  $F$  was considered to allow populations to exchange migrant alleles through a common gene pool. Thus,  $\pi_i$  now represented the constant (reference) allele frequency in this gene pool. A step simulating migration was then further introduced between step 2 (genetic drift) and step 3 (selection) as follows:

1) Compute the immigration rate as  $m_j = (1 - F) / 4N_j F$

2) Sample the number of immigrants (chromosomes)  $n_j^{im}$  entering population  $j$  as

$$n_j^{im} \sim B(2N_j, m_j)$$

3) Generate the number of immigrants  $n_{-j}^{im}$  chromosomes from each population (other than  $j$ ) as  $\mathbf{n}_{-j}^{im} \sim M(n_j^{im}, \mathbf{p}_{-j}^m)$  where  $\mathbf{p}_{-j}^m$  is a vector with  $P-1$  elements all equal to  $1/(P-1)$

4) Determine the number of reference alleles  $n_1^{gain}$  among the immigrants by sampling a binomially-distributed number from each population other than  $j$  (with parameters equal to the corresponding number of immigrants chromosomes and reference allele frequencies)

5) Determine the number of chromosomes  $n_1^{lost}$  lost which carry the reference allele among the  $n_j^{mig} = n_j^{im}$  migrants as  $n_1^{lost} \sim B(n_j^{mig}, p_{ij,t}^*)$

6) Update allele frequency as  $p_{ij,t}^* = p_{ij,t}^* + \frac{n_1^{gain} - n_1^{lost}}{2N_j}$
