# Supplementary material for: A Bayesian Outlier Criterion to Detect SNPs under Selection in Large Data Sets
Source: PubMed Central journal article supplement (PMC2914027; doi:10.1371/journal.pone.0011913), 2010-08-02

A) DS1 analyzed with Model 1

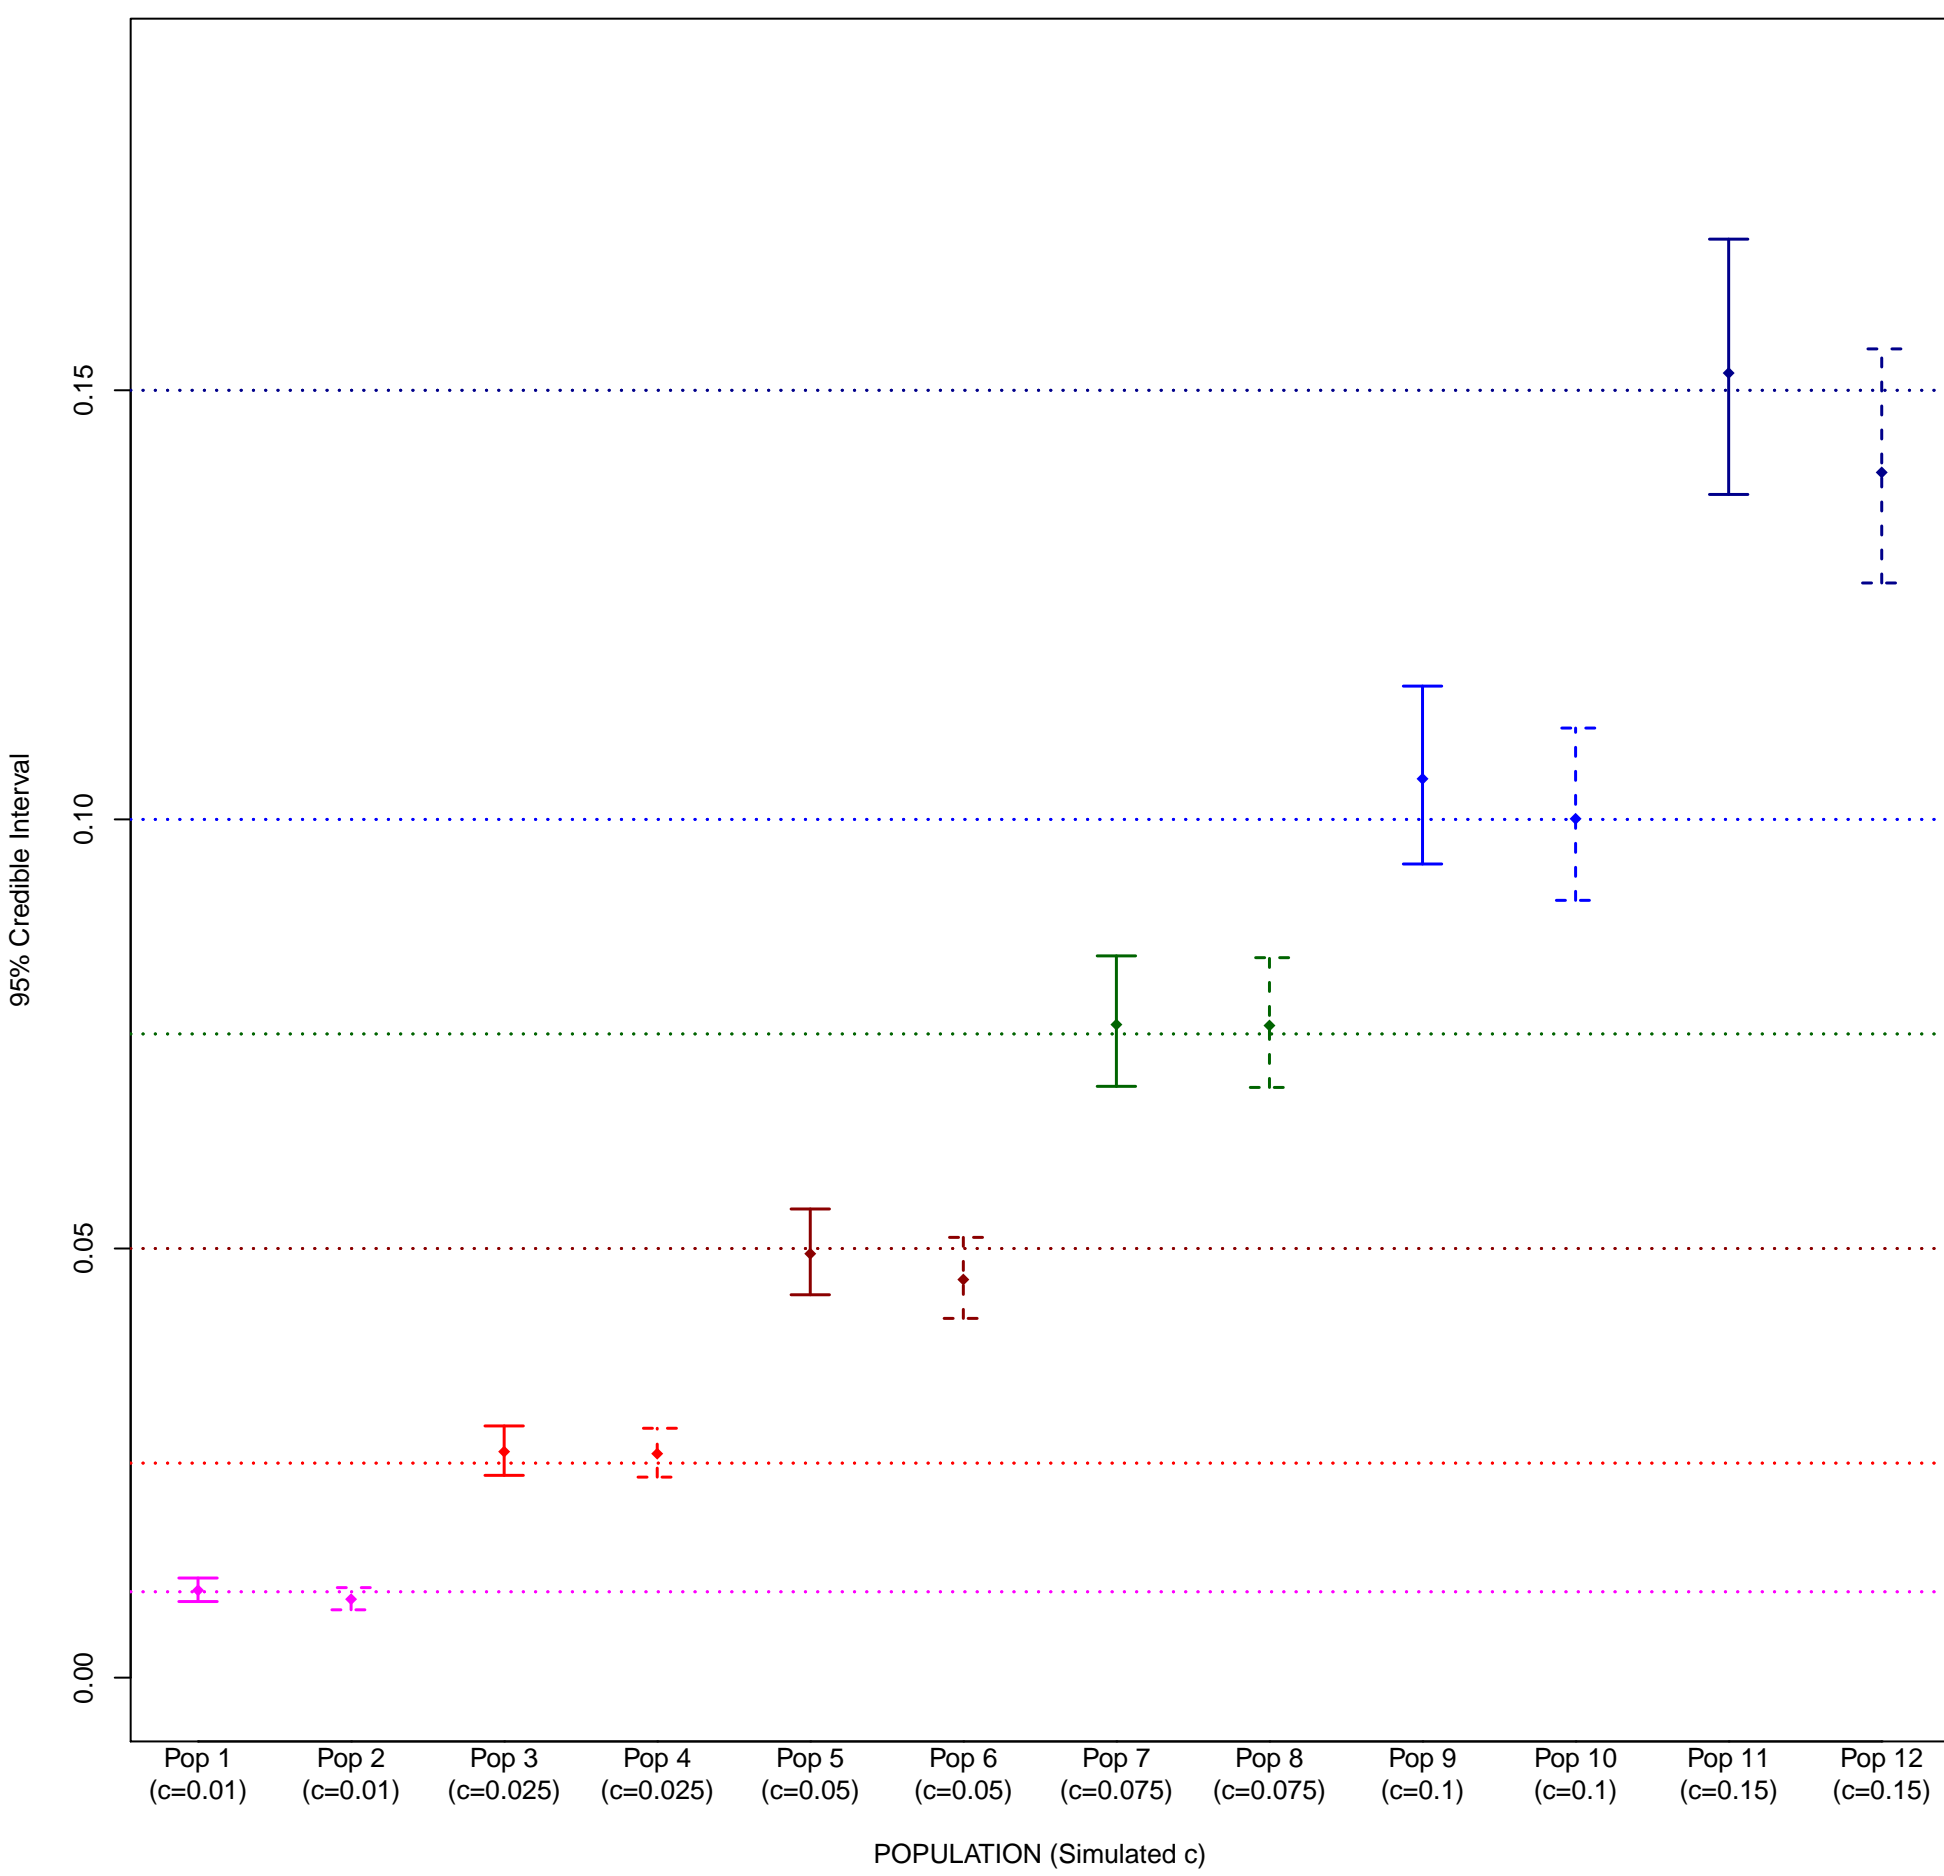

C) DS2 analyzed with 1

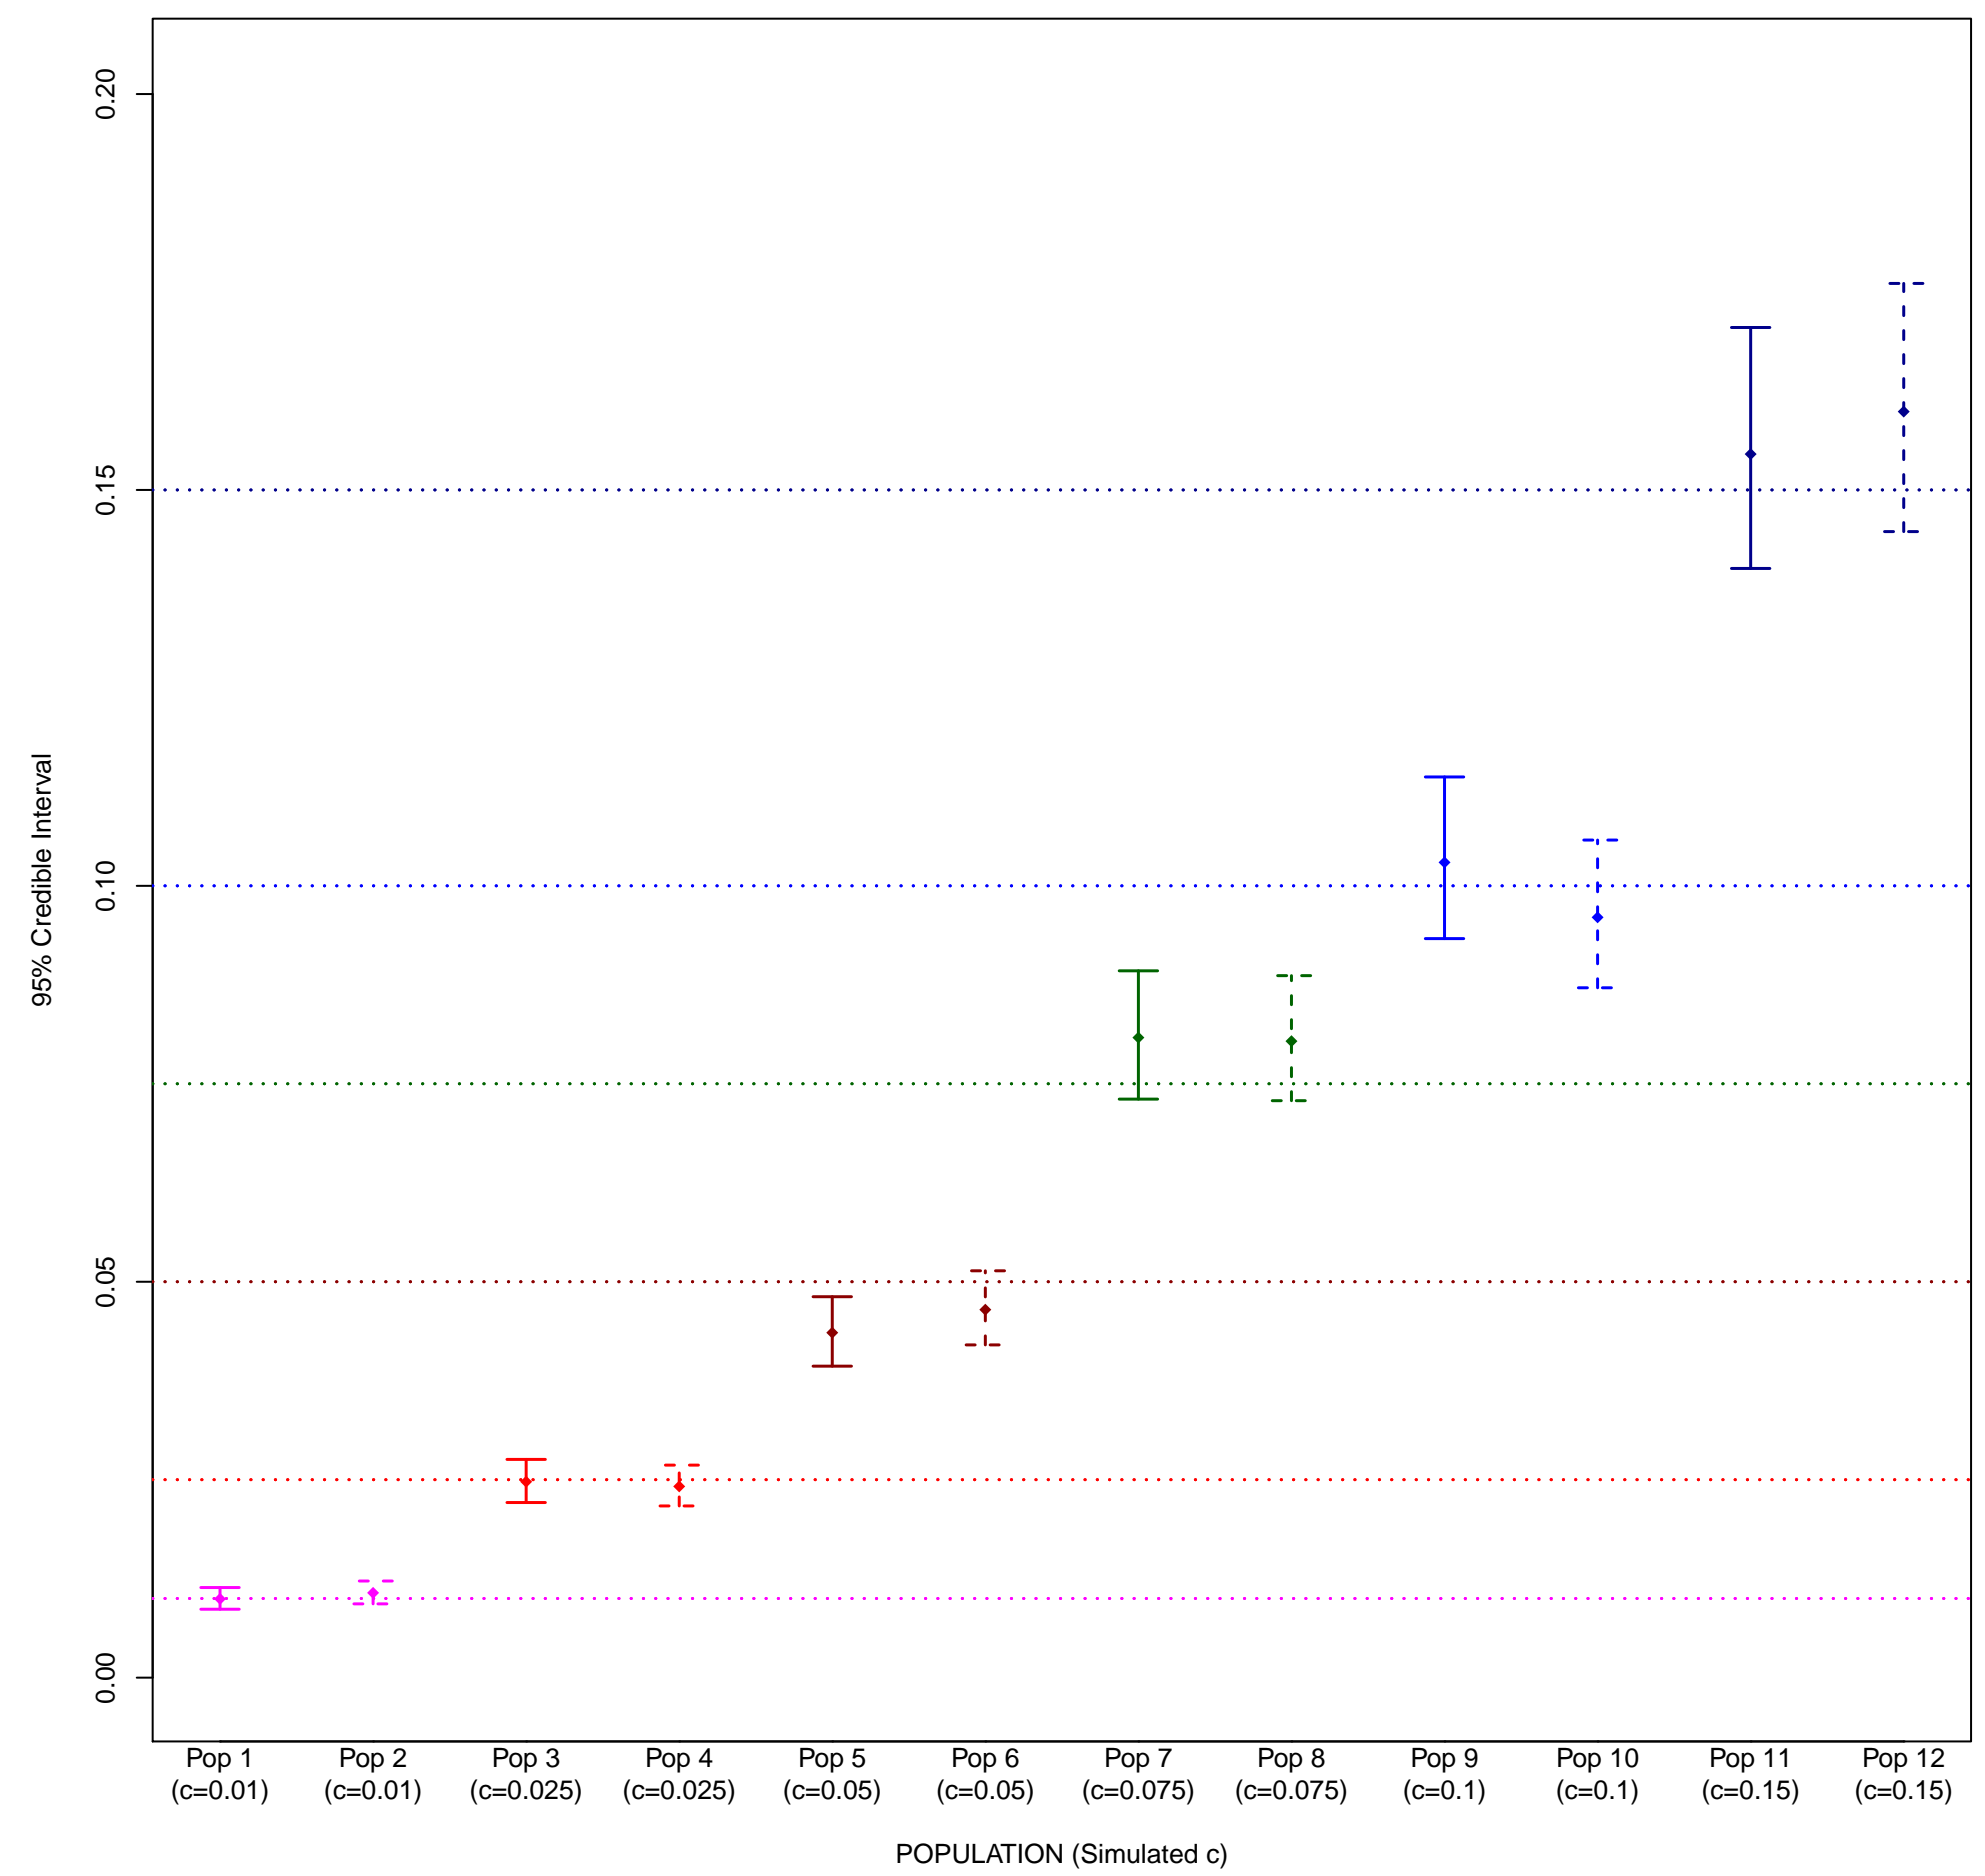

B) DS1 analyzed with Model 2

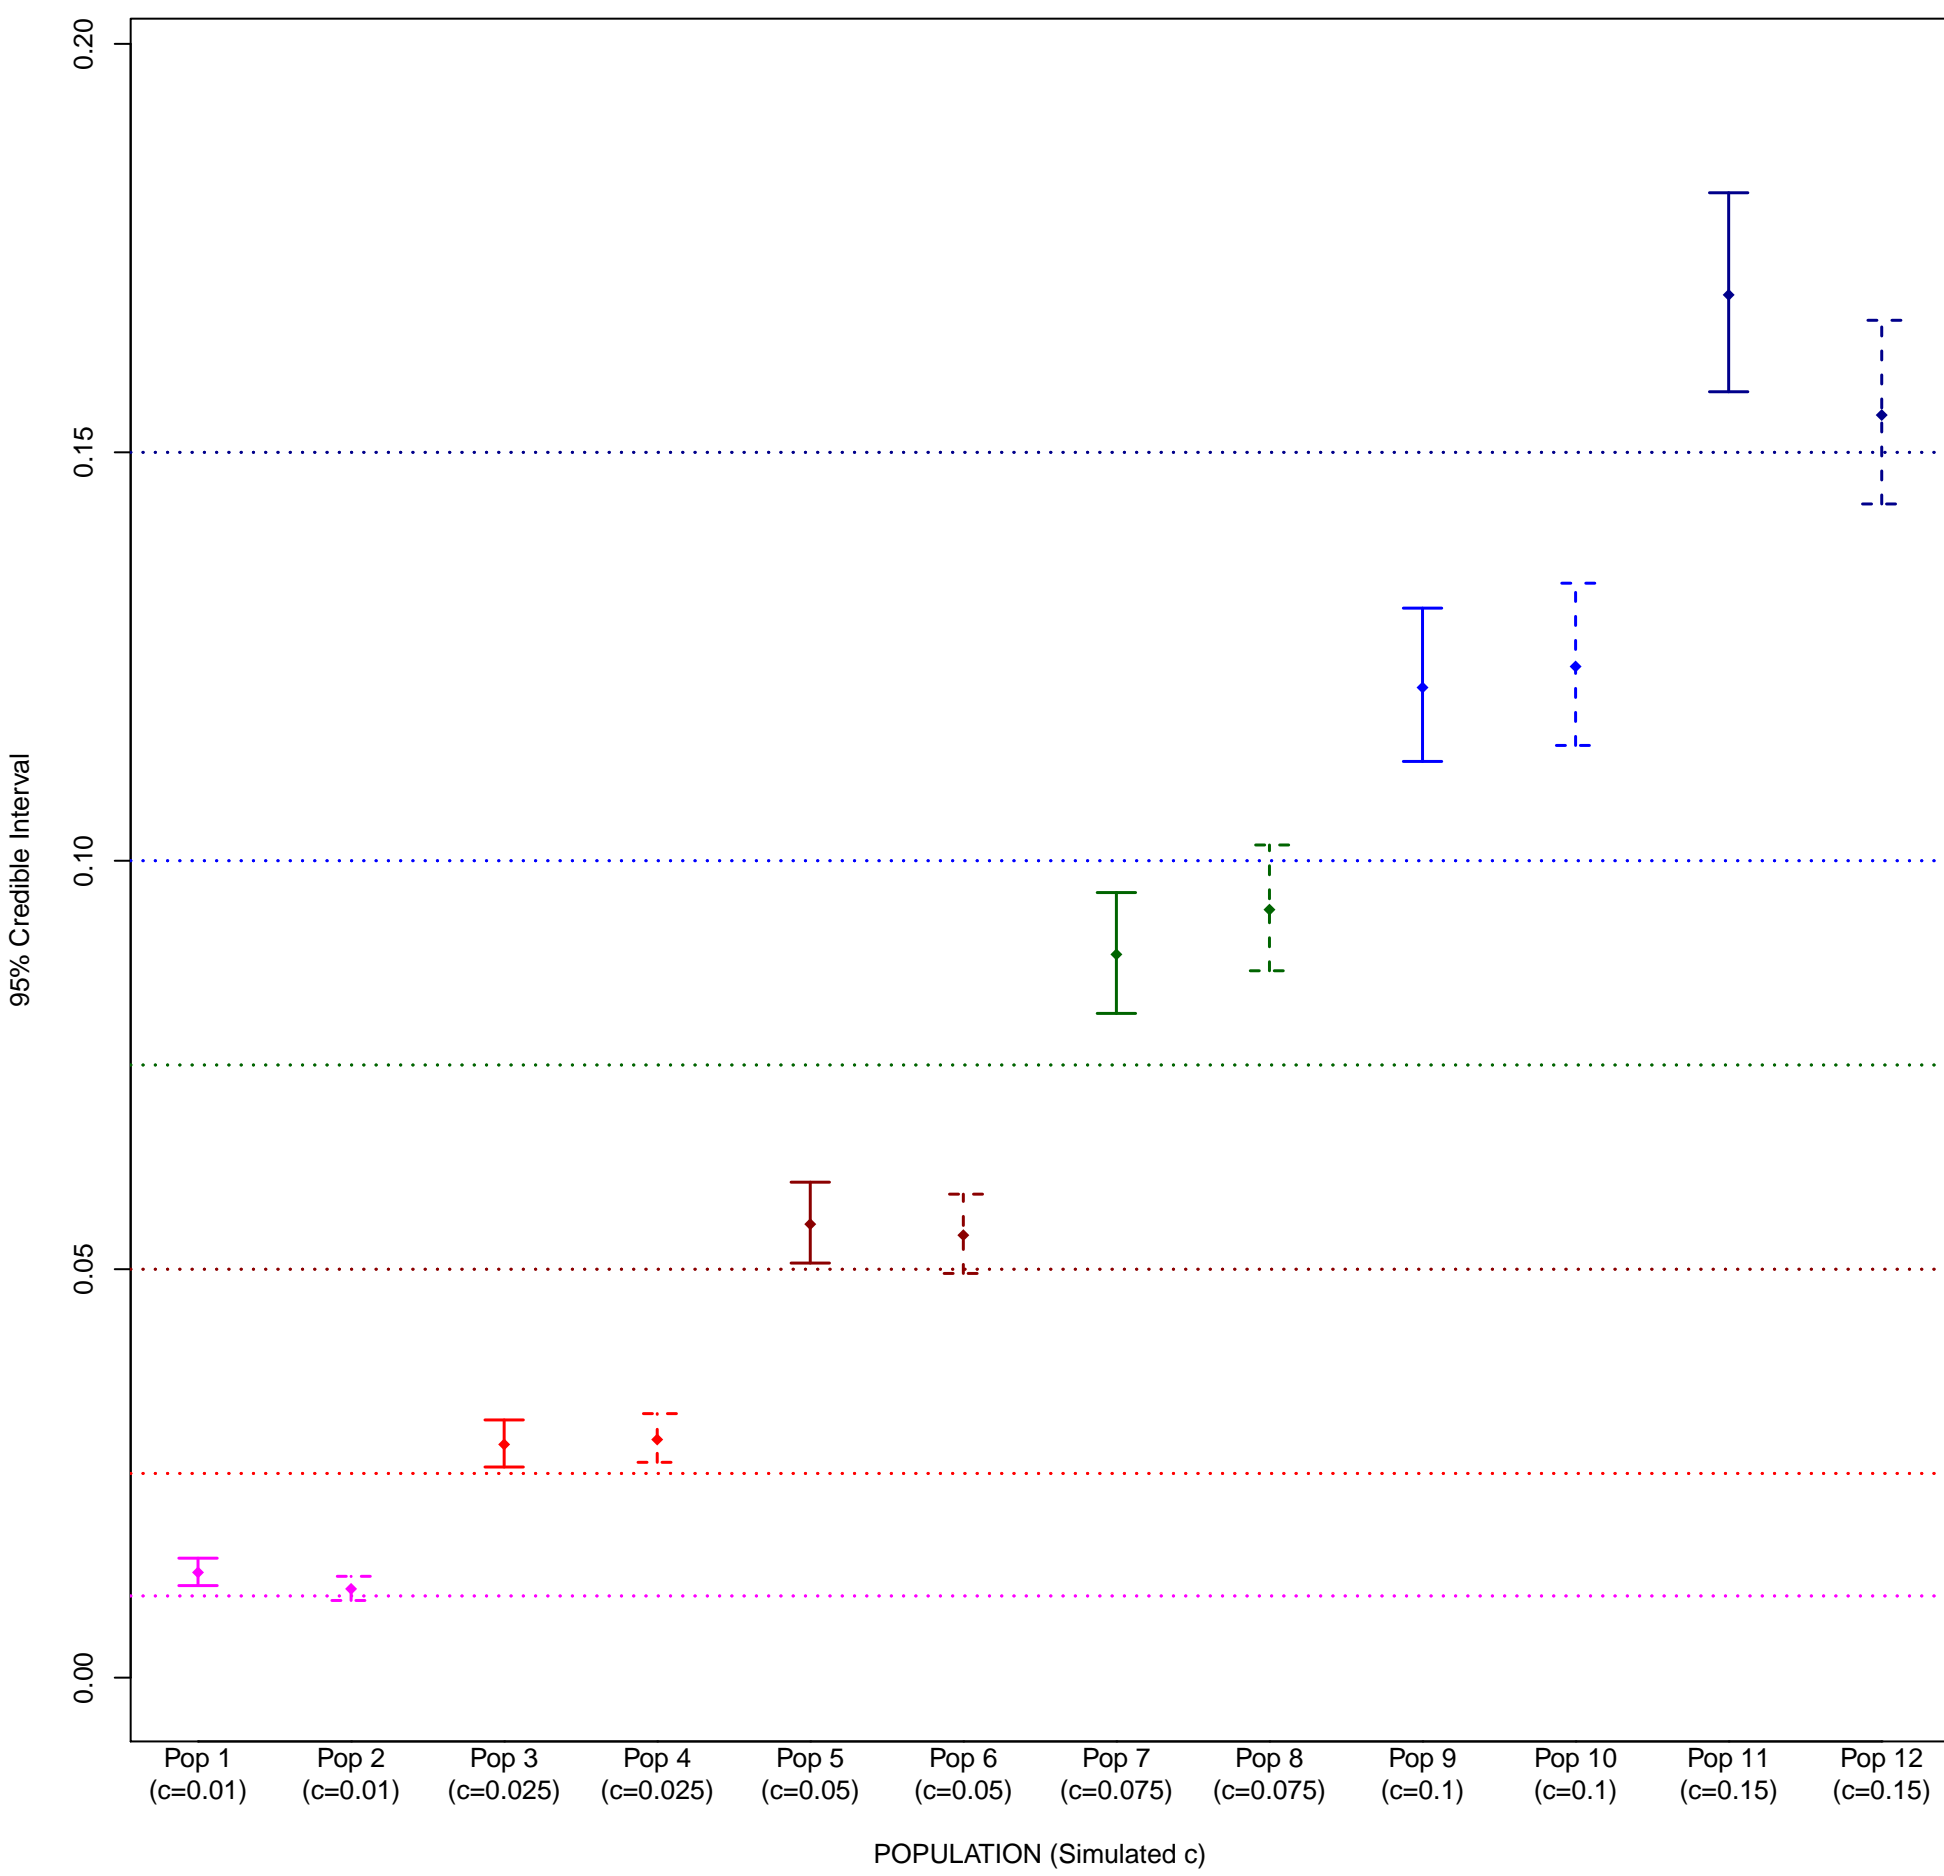

D) DS2 analyzed with Model 2

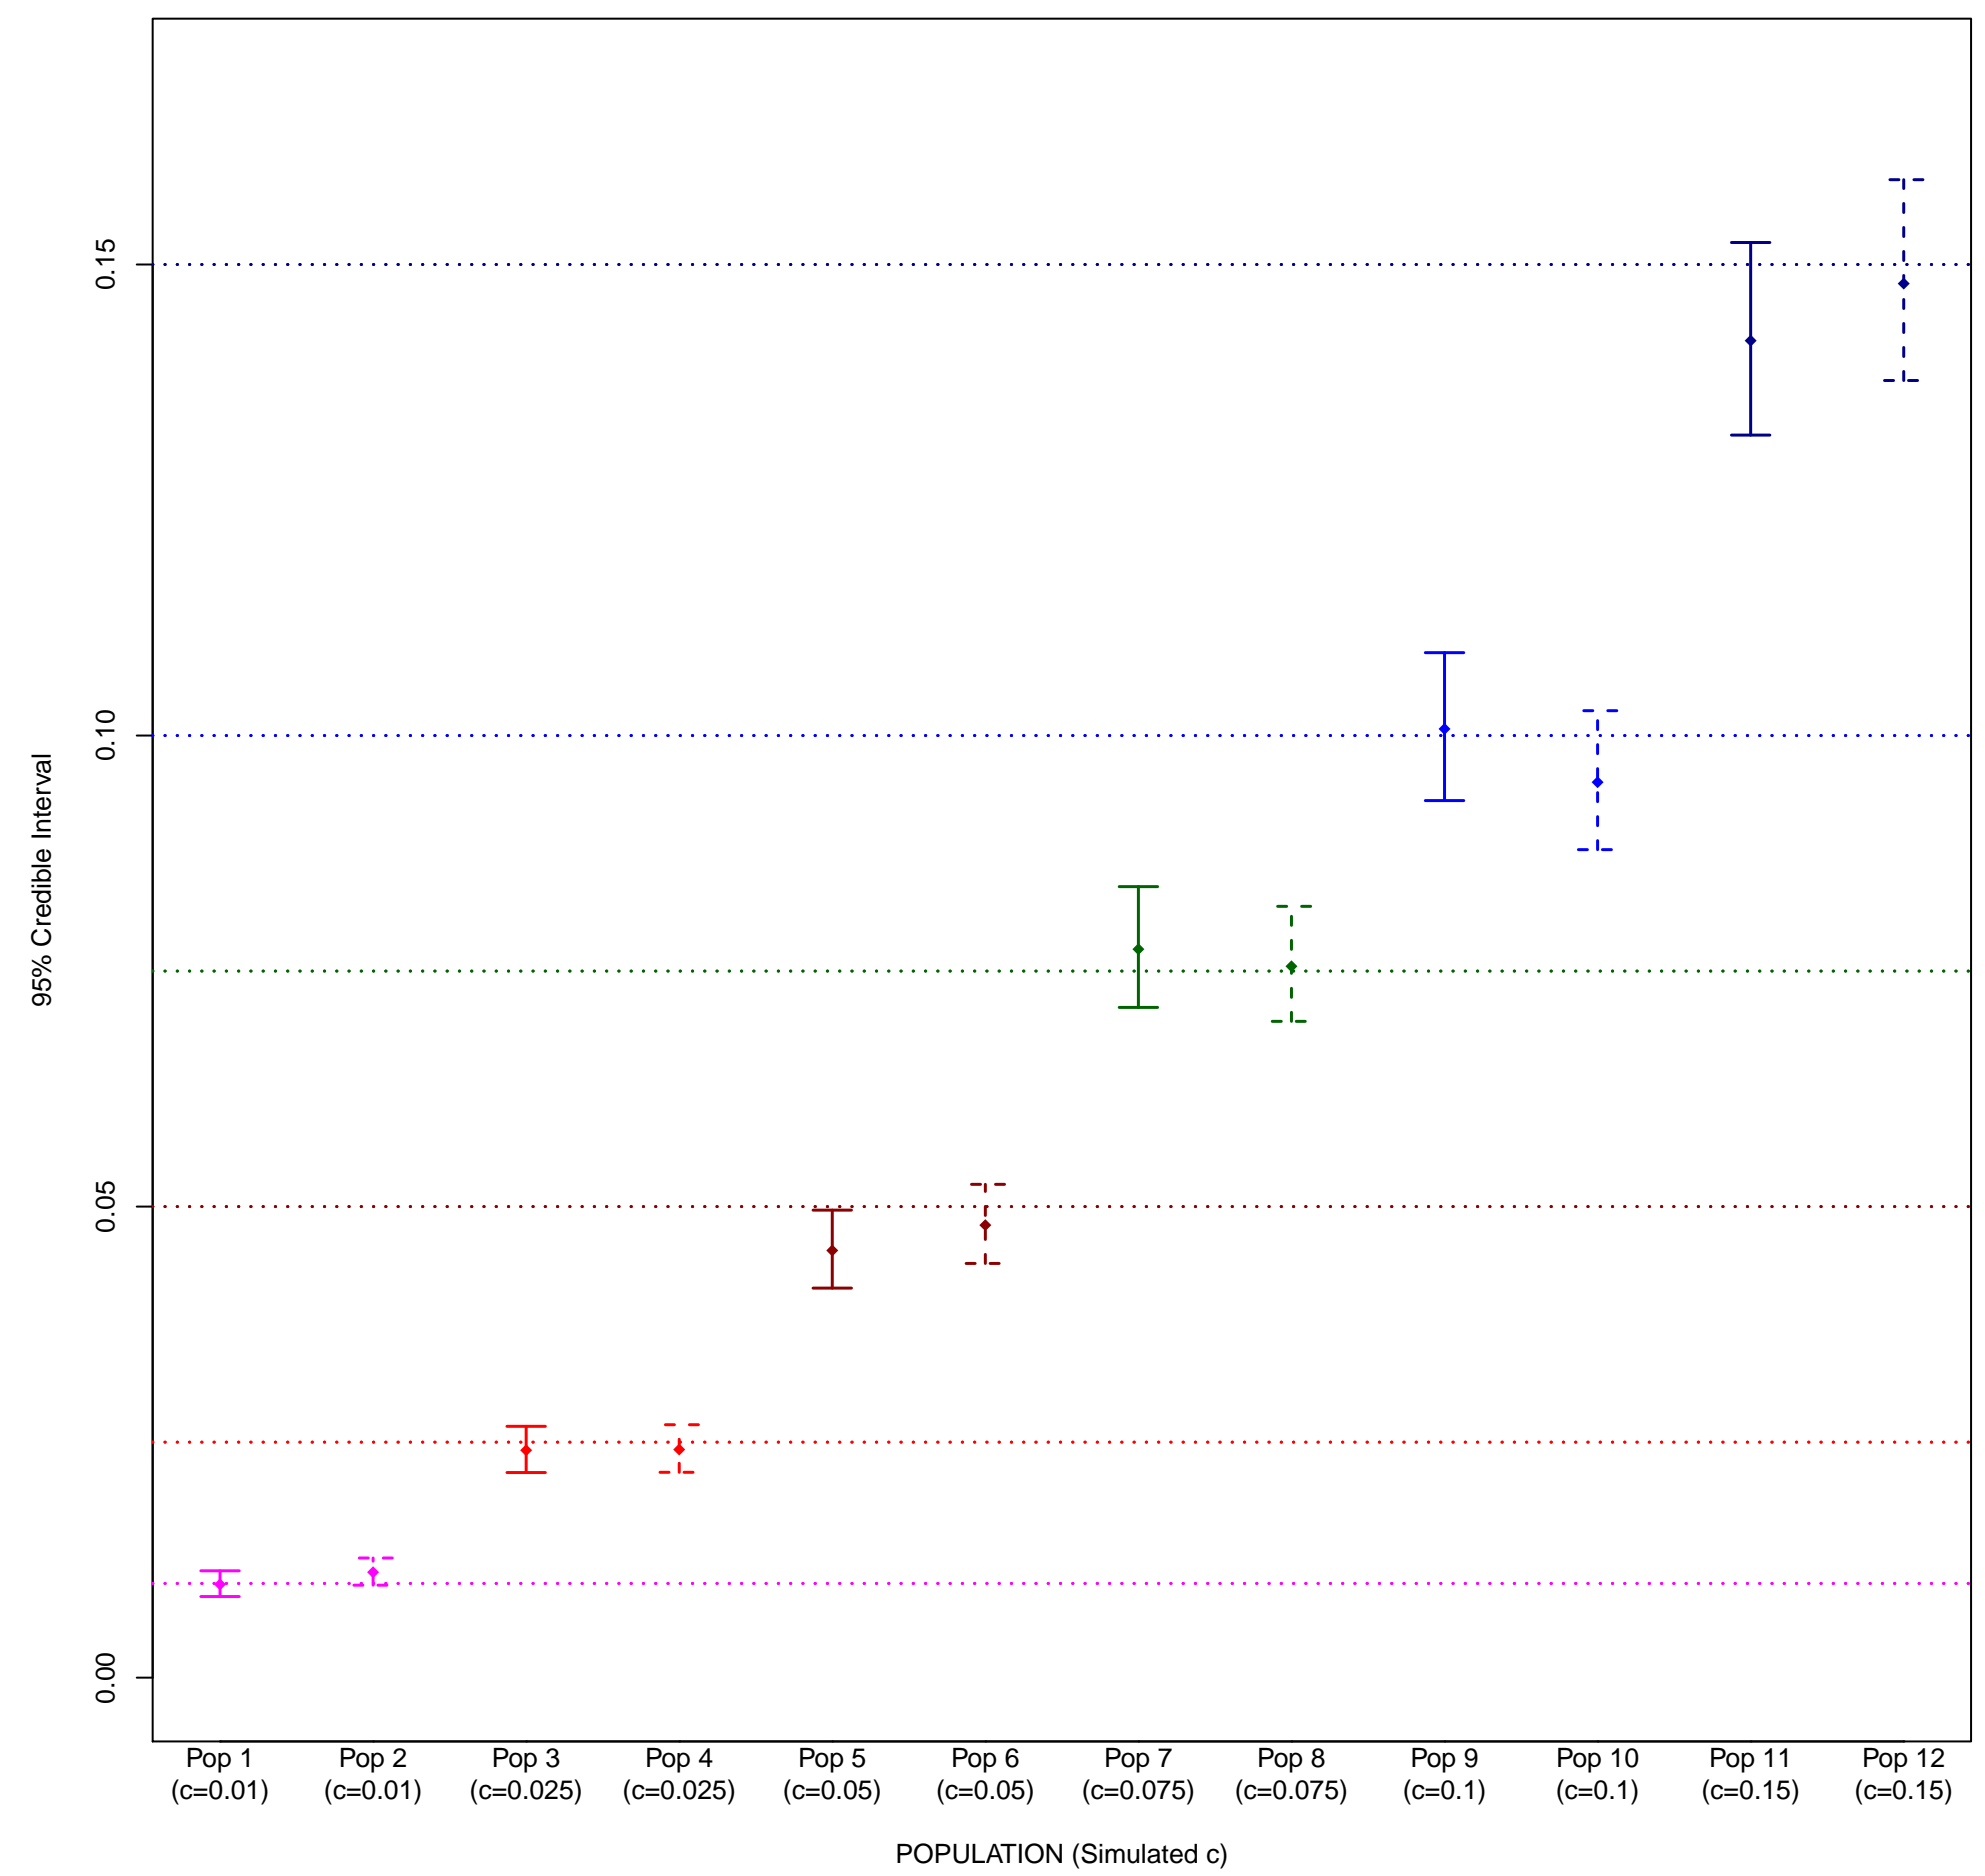

Supplement: pone.0011913.s006.pdf [file pone.0011913.s006.pdf]
