# Supplementary material for: A Bayesian Outlier Criterion to Detect SNPs under Selection in Large Data Sets
Source: PubMed Central journal article supplement (PMC2914027; doi:10.1371/journal.pone.0011913), 2010-08-02

A) Analysis with model 1

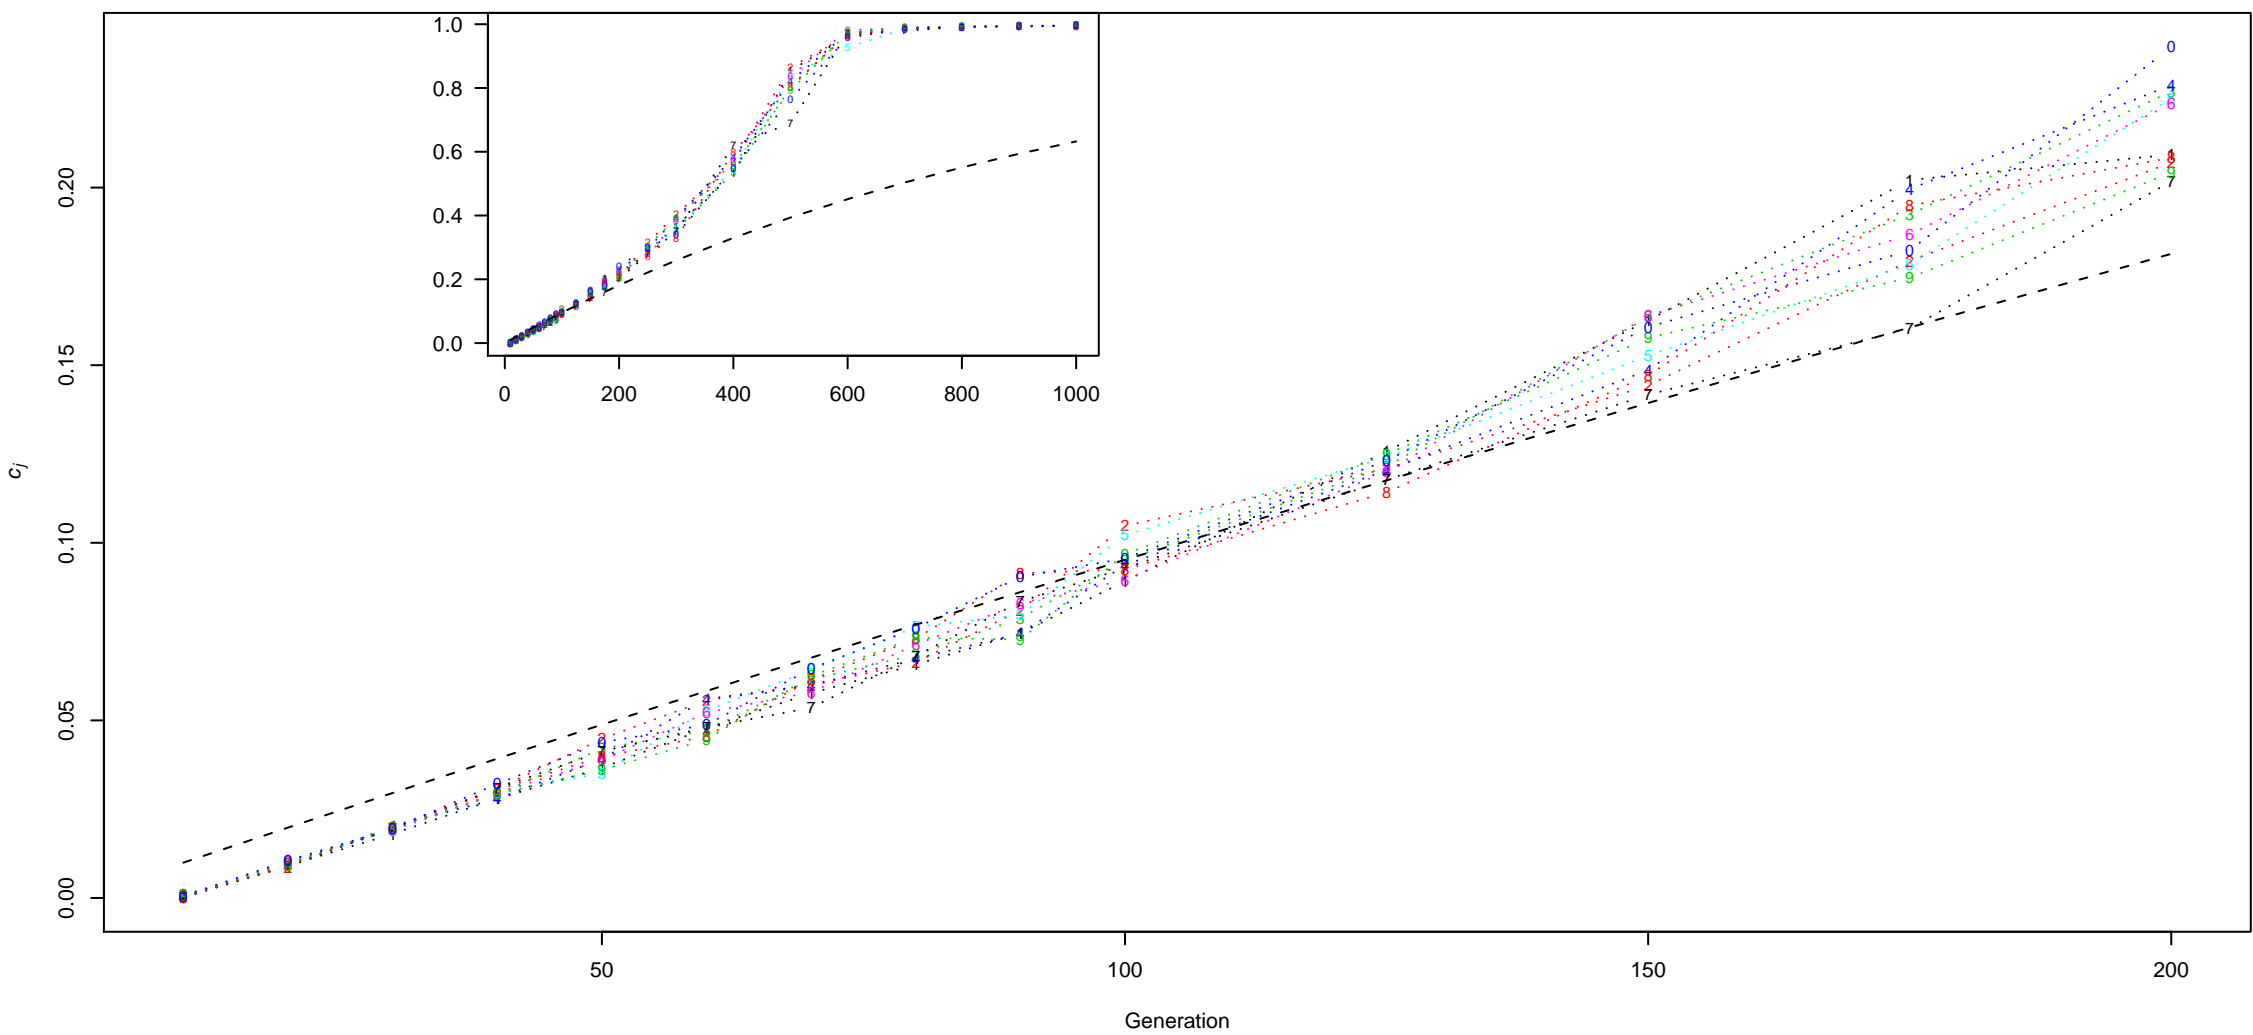

B) Analysis with model 2

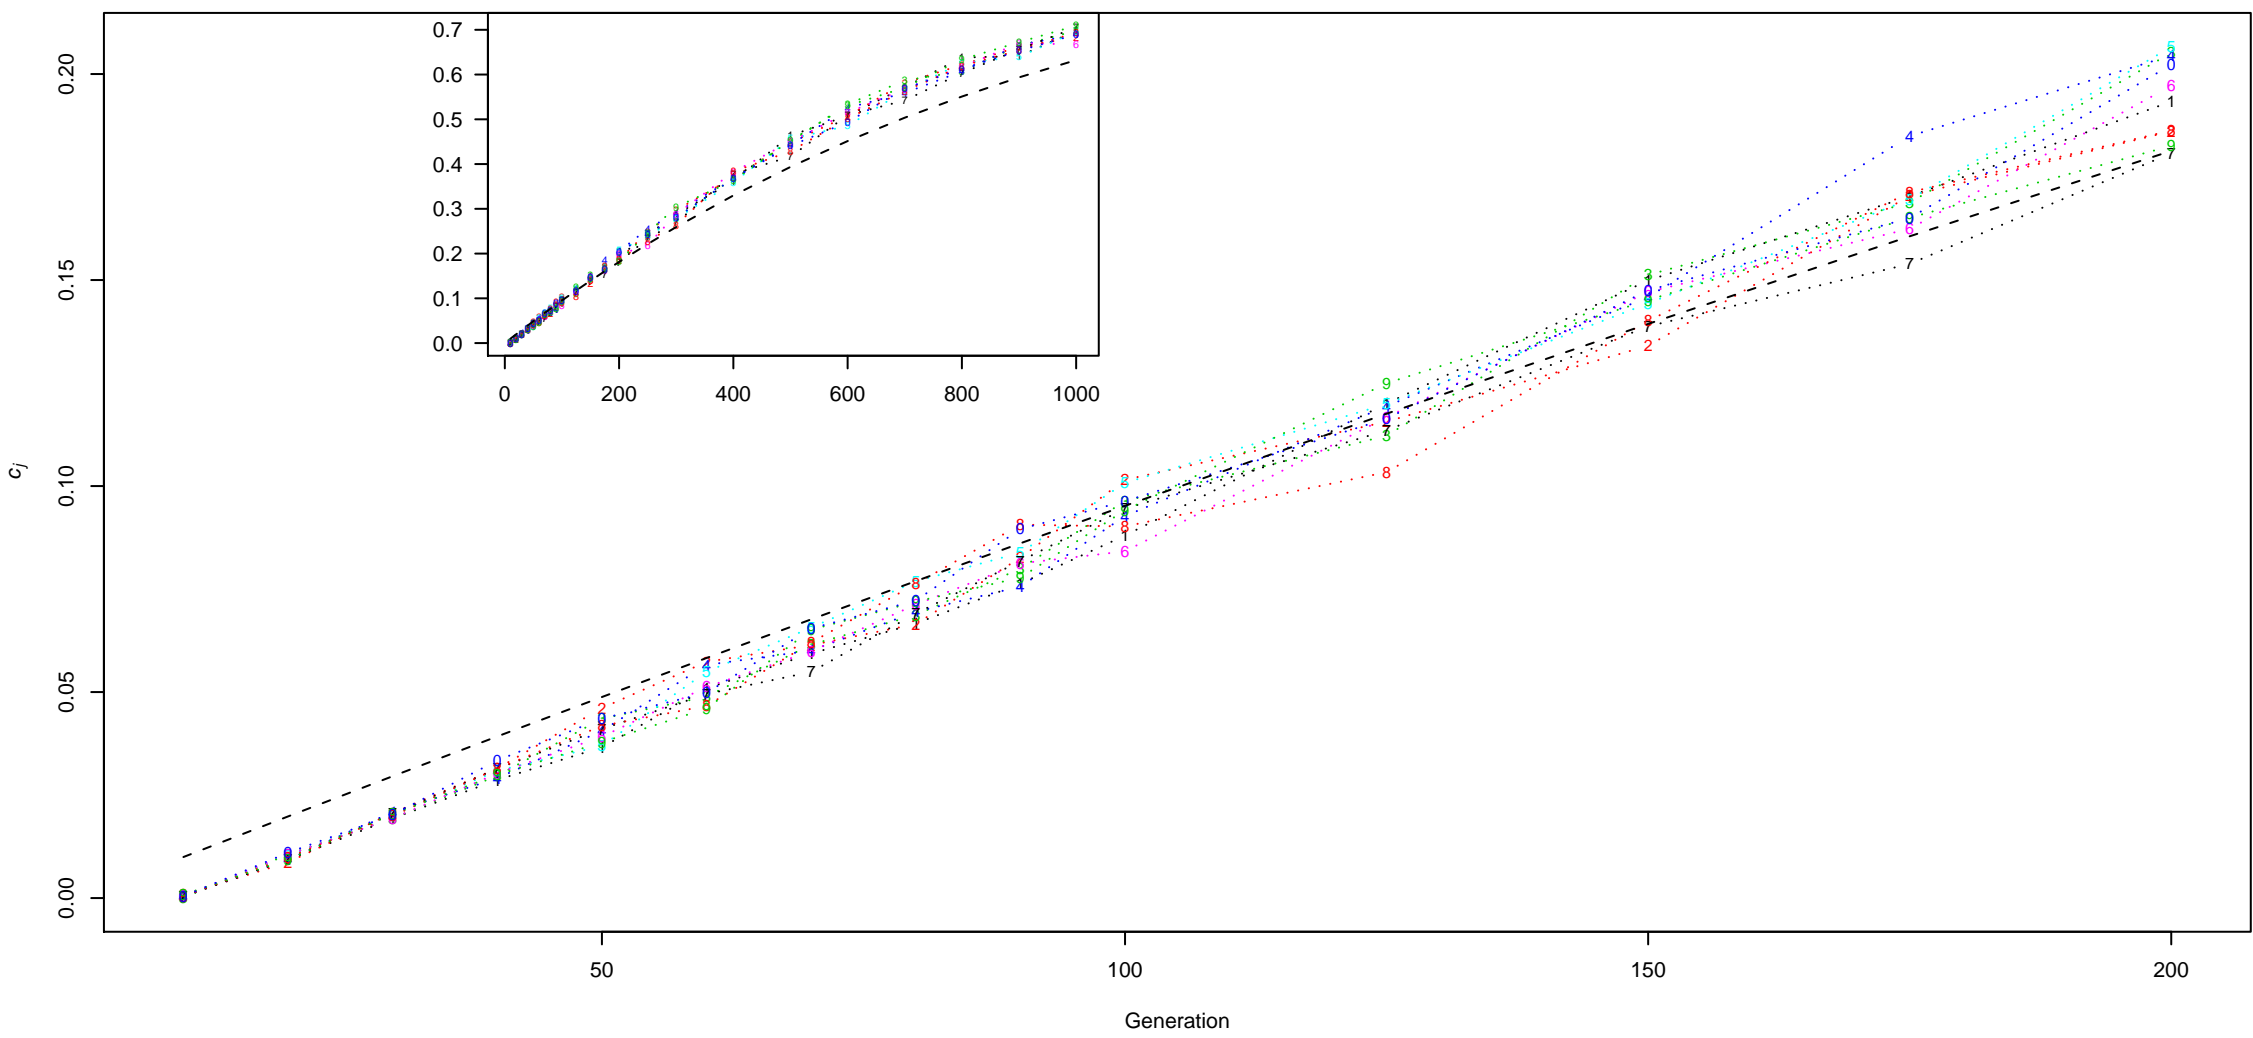

Supplement: pone.0011913.s007.pdf [file pone.0011913.s007.pdf]
