# Supplementary material for: A Bayesian Outlier Criterion to Detect SNPs under Selection in Large Data Sets
Source: PubMed Central journal article supplement (PMC2914027; doi:10.1371/journal.pone.0011913), 2010-08-02

**Cj=0.02 Pi=0.05**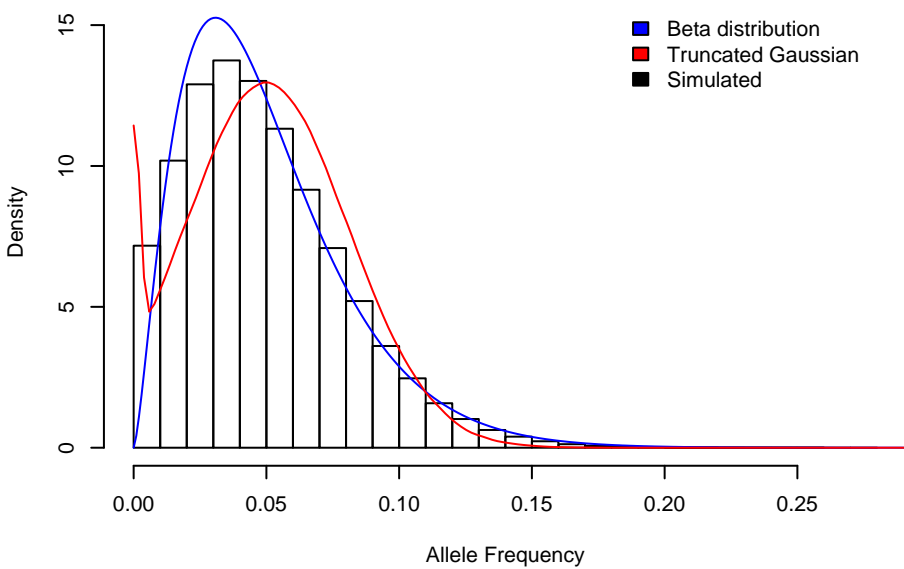**Cj=0.02 Pi=0.25**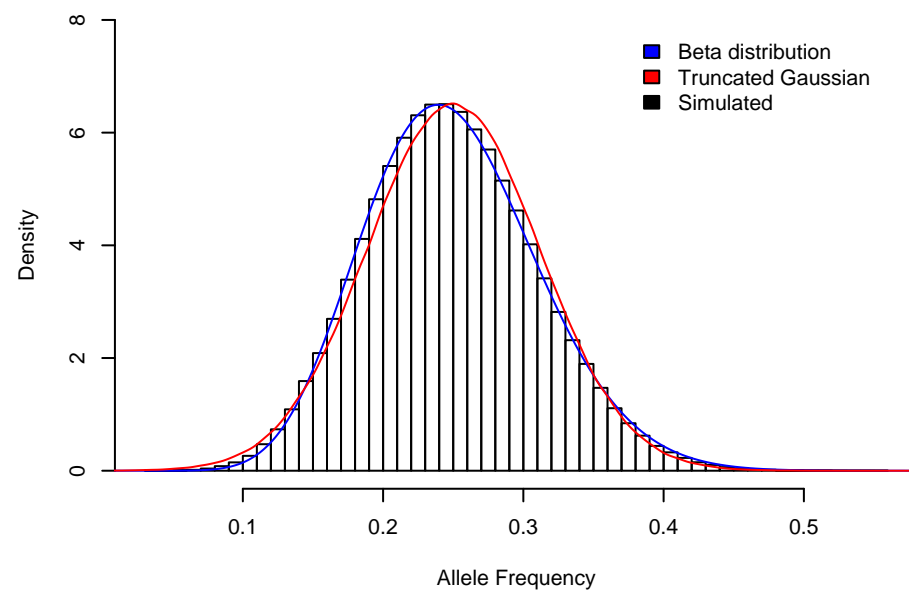**Cj=0.02 Pi=0.5**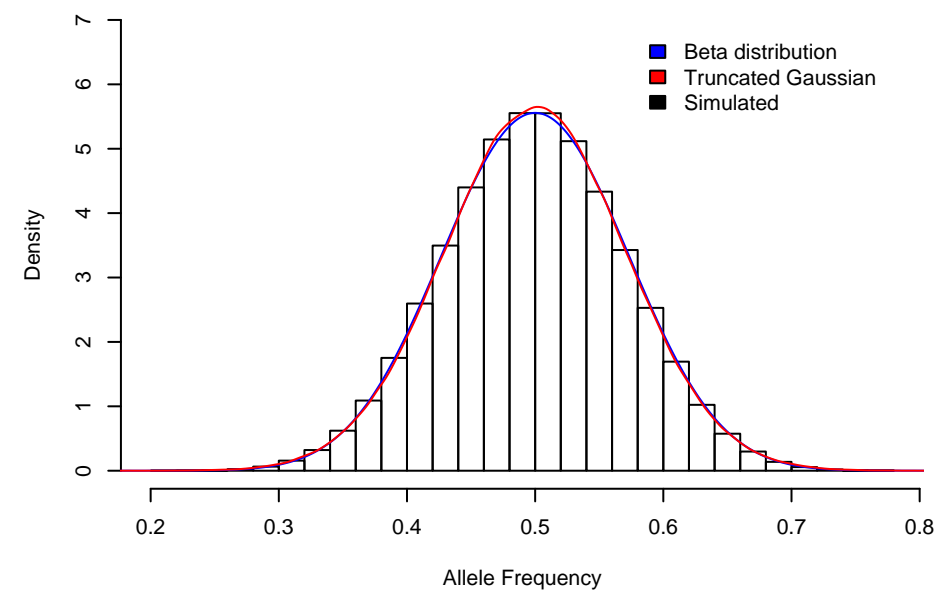**Cj=0.1 Pi=0.05**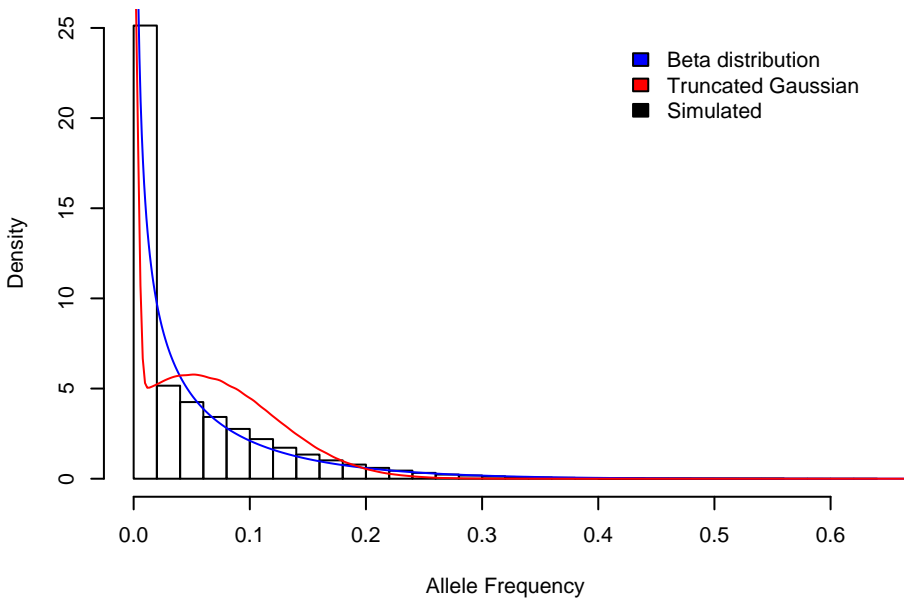**Cj=0.1 Pi=0.25**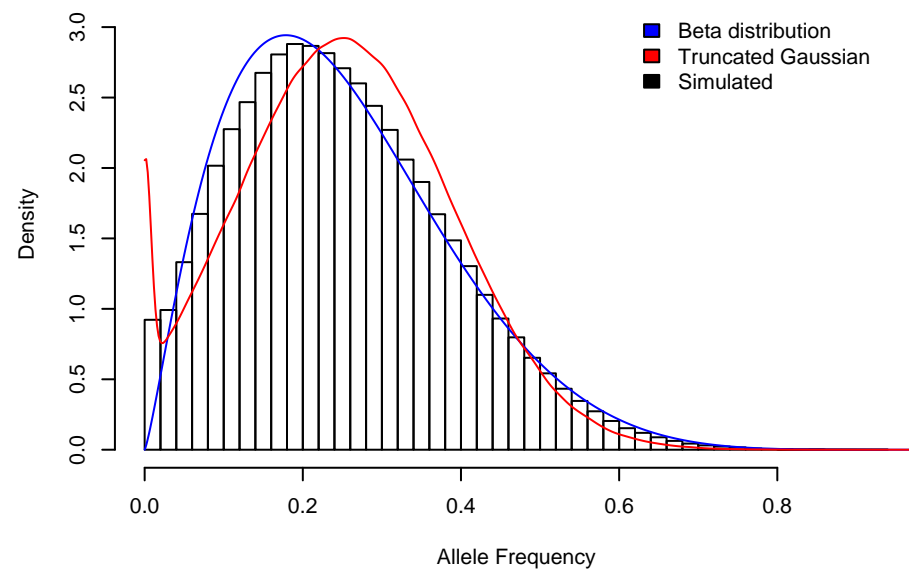**Cj=0.1 Pi=0.5**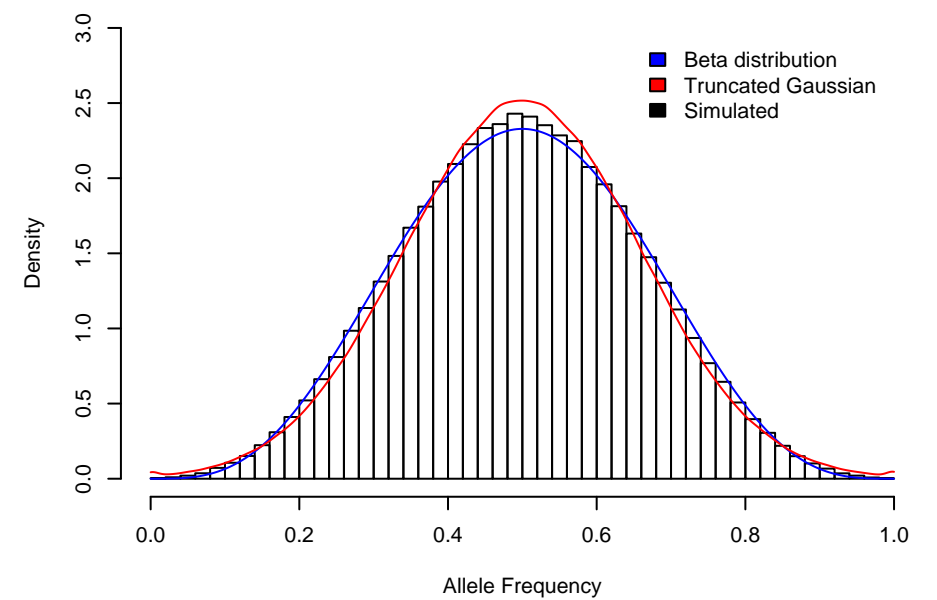**Cj=0.25 Pi=0.05**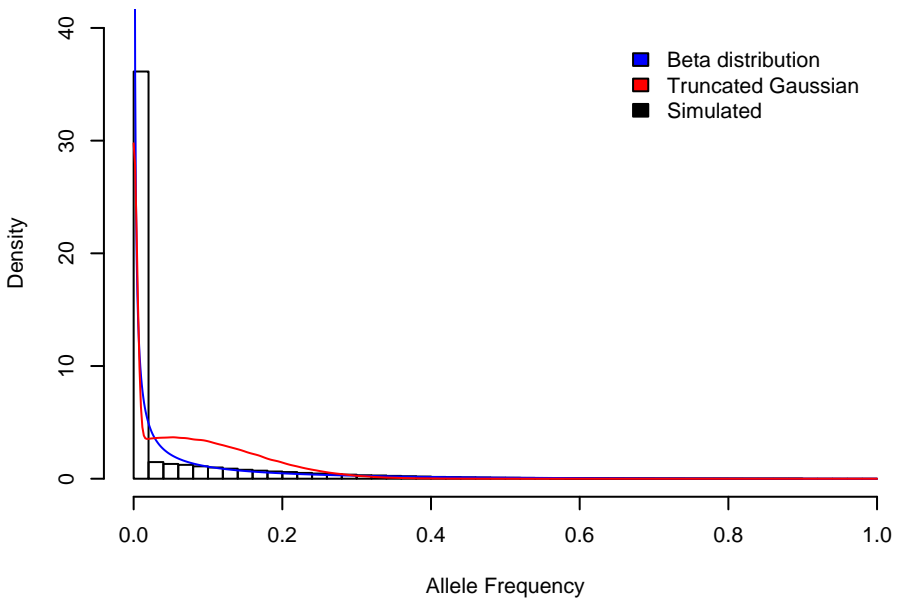**Cj=0.25 Pi=0.25**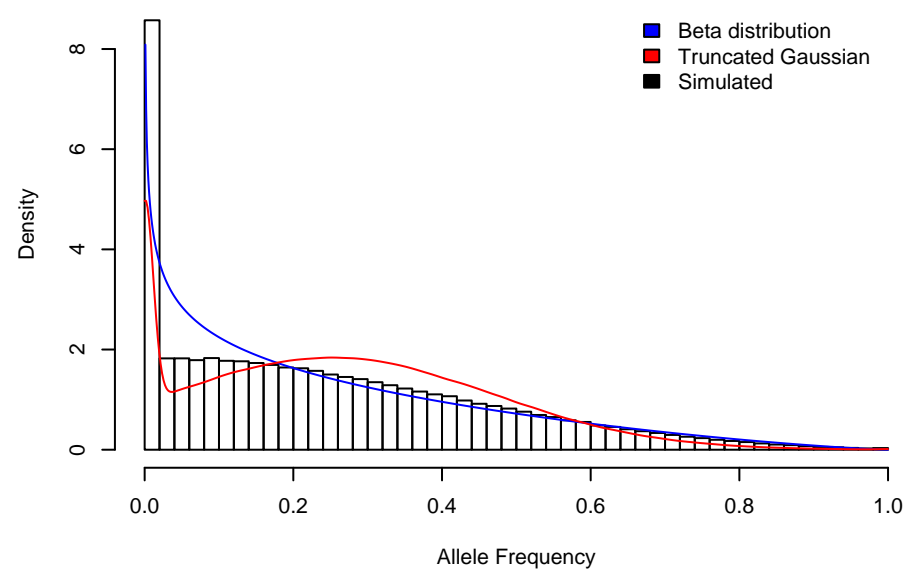**Cj=0.25 Pi=0.5**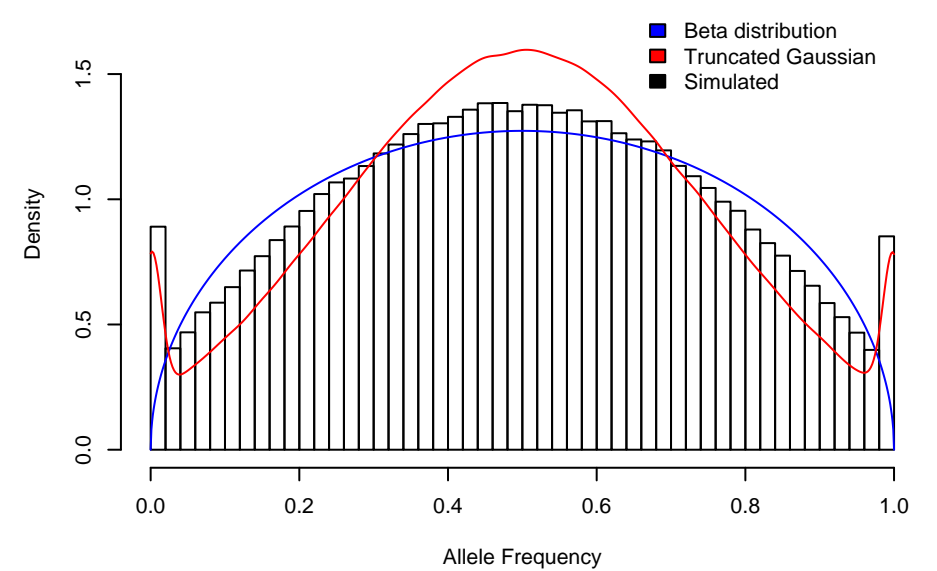**Cj=0.5 Pi=0.05**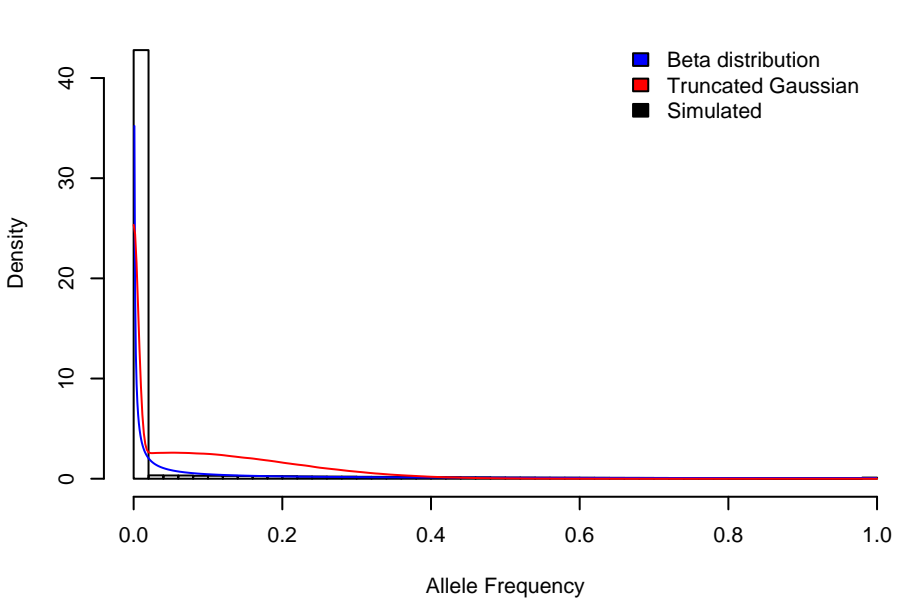**Cj=0.5 Pi=0.25**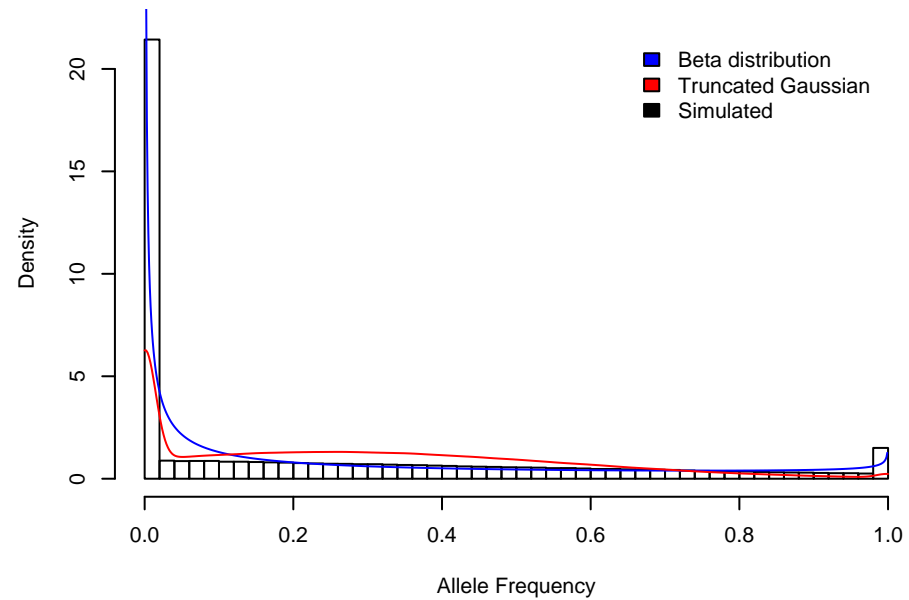**Cj=0.5 Pi=0.5**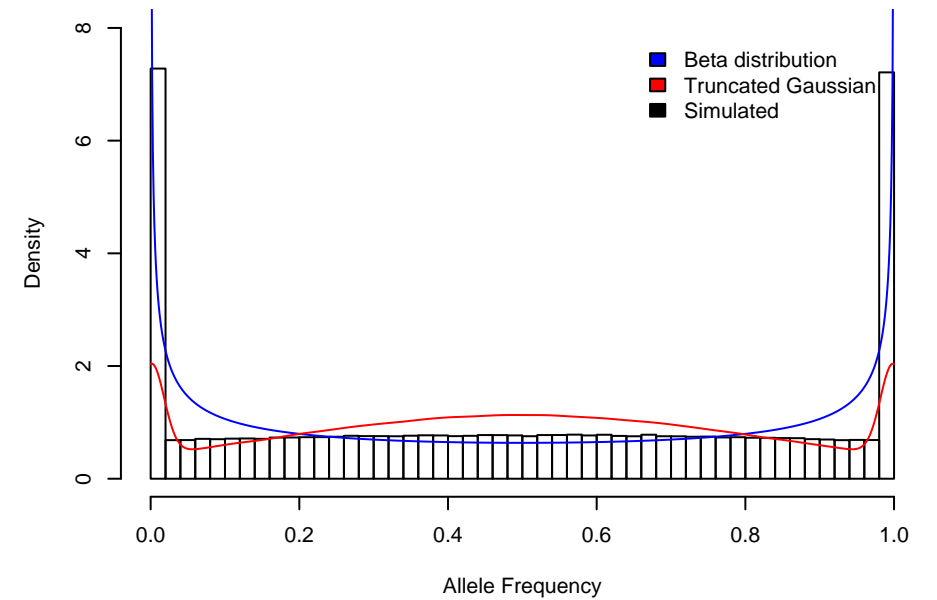

Supplement: pone.0011913.s008.pdf [file pone.0011913.s008.pdf]
