# Supplementary material for: A Bayesian Outlier Criterion to Detect SNPs under Selection in Large Data Sets
Source: PubMed Central journal article supplement (PMC2914027; doi:10.1371/journal.pone.0011913), 2010-08-02

**A) Analysis with model 1**

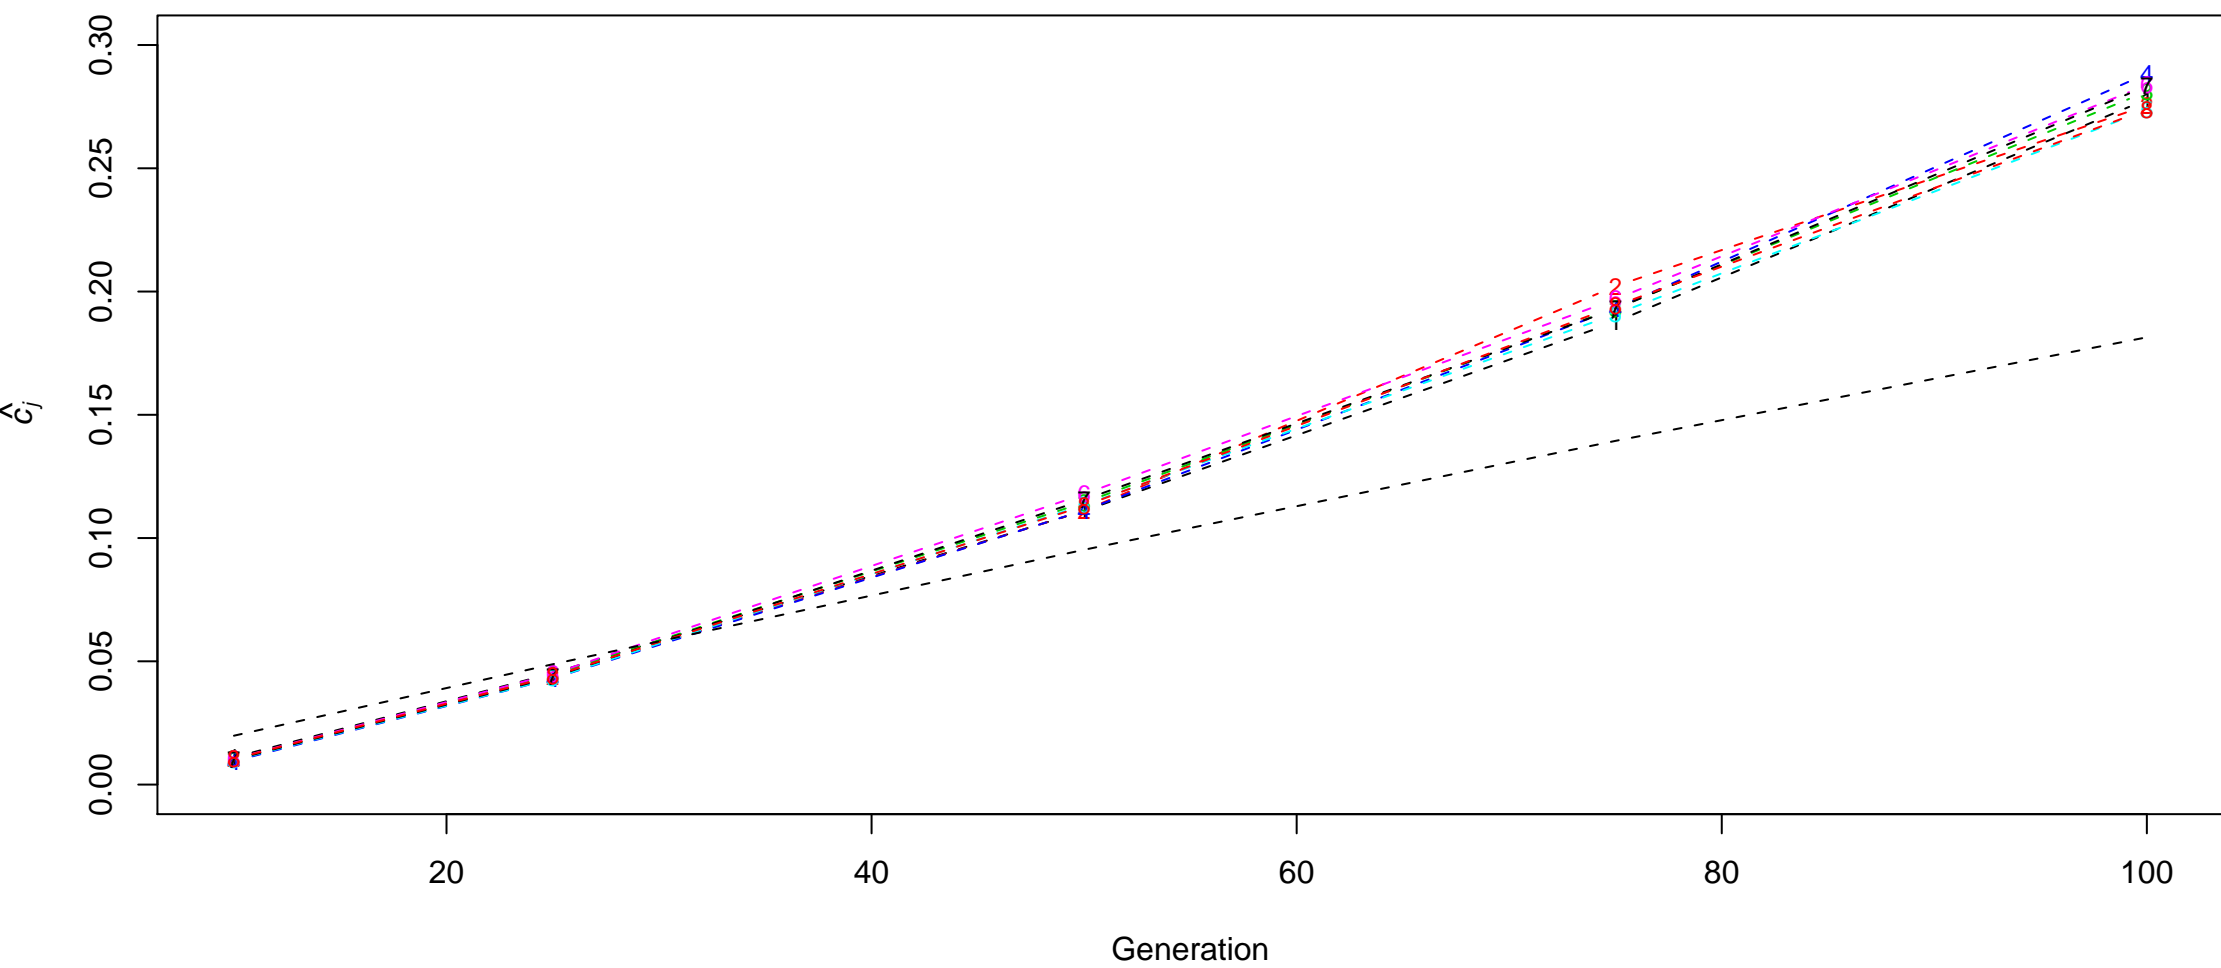

**B) Analysis with model 2**

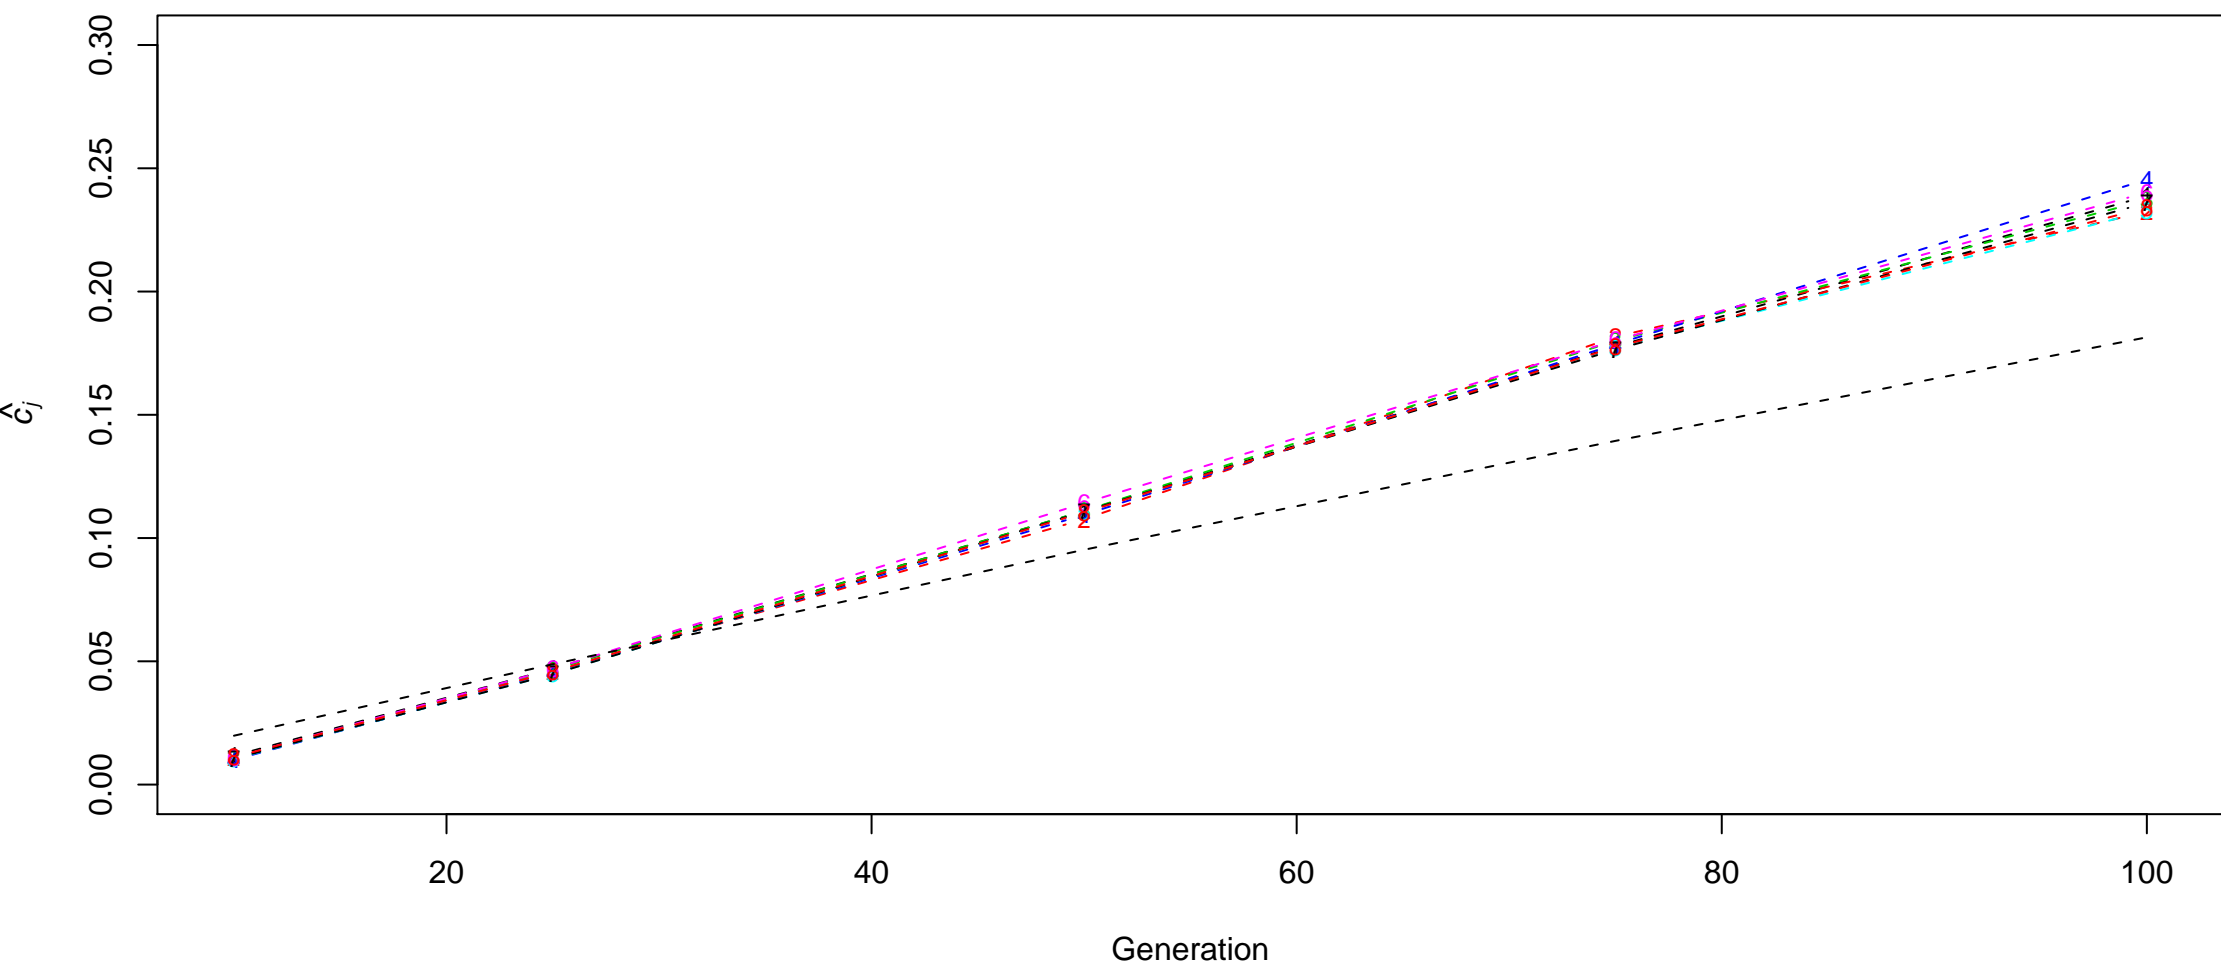

Supplement: pone.0011913.s009.pdf [file pone.0011913.s009.pdf]
